# Supplementary material for: Hierarchical flower-like TiO2/MPCNFs as a free-standing anode with superior cycling reversibility and rate capability
Source: Royal Society of Chemistry journal article supplement (doi:10.1039/c3ra47685e), 2014-01-01
Supplement: c3ra47685e1.pdf [file c3ra47685e1.pdf]

## **ELECTRONIC SUPPLEMENTARY INFORMATION**

### **Hierarchical flower-like TiO<sub>2</sub>/MPCNFs as a free-standing anode with superior cycling reversibility and rate capability**

Donghua Teng, Yunhua Yu and Xiaoping Yang\*

State Key Laboratory of Organic-Inorganic Composites, Beijing University of

Chemical Technology, Beijing, China.

\* Corresponding author, E-mail: yangxp@mail.buct.edu.cn.

## Experimental

*Preparation:* Tetrabutyl titanate/polyacrylonitrile ( $\text{Ti}(\text{OC}_4\text{H}_9)_4/\text{PAN}$ ) nanofibers were electrospun and stabilized at 250 °C for 2 h in air following our previous work.<sup>1</sup> Subsequently, the stabilized webs (each size of  $\sim 5 \times 5$  cm and total weight of  $\sim 500$  mg) were immersed into urea-containing (0.5 g) ethylene glycol aqueous solution (EG/ $\text{H}_2\text{O}$ , 100 ml, 3:7 by volume), which was loaded in a 150 ml Teflon-lined stainless steel autoclave and kept at 180 °C for 4 h. After cooling down to ambient temperature, the impregnated webs were repetitively washed with ethanol and finally calcined at 600 °C for 2 h under 3 °C  $\text{min}^{-1}$  in highly pure  $\text{N}_2$ . For comparison, nanoparticulate (EG solvothermal treatment) and micro-particulate ( $\text{H}_2\text{O}$  solvothermal treatment)  $\text{TiO}_2/\text{MPCNFs}$  were also prepared under similar conditions.

*Structural characterization:* Microstructures of samples were observed using a field emission scanning electron microscope (FESEM, Hitachi S-4700) with an energy dispersive X-ray (EDX) spectrometer, a transmission electron microscope (TEM, Hitachi H-800) and a high-resolution transmission electron microscope (HRTEM, JEM-3010) with a select-area electron diffractometer (SAED). Thermogravimetric analyses (TGA) were performed on a TG analyzer (Q500, TA) from 100 to 750 °C at a heating rate of 10 °C/min in air. According to Brunauer-Emmett-Teller (BET) equation, specific surface areas were calculated from adsorption/desorption isotherms for  $\text{N}_2$  using an automatic gas adsorption analyzer (Micromeritics ASAP 2010) at -196 °C. Prior to the measurements, all samples were

degassed and dehydrated at 200 °C for 24 h. Crystal phases were identified by X-ray diffraction (XRD, Rigaku D/max 2500 VB2+/PC, Cu K $\alpha$ ,  $\lambda$  = 0.154 nm).

*Electrochemical characterization:* Electrochemical measurements were carried out using standard three-electrode CR 2025 coin cells, which were identically assembled following our previous work.<sup>1</sup> Cyclic voltammetry (CV) measurements were performed at a scan rate of 0.2 mV s<sup>-1</sup> or at different scan rates of 0.2-1.0 mV s<sup>-1</sup> in the voltage windows of 1-3 or 0.001-3 V using an electrochemical workstation (Metrohm Autolab PGSTAT 302N). Electrochemical impedance spectroscopic (EIS) analyses were carried out on the same electrochemical workstation by applying a potentiostatic signal amplitude of 10 mV over 200 kHz to 0.1 Hz. The cells were discharged and charged on a cell testing instrument (LAND CT2001A) in the voltage windows of 1-3 or 0.001-3 V at a current density of 50 mA g<sup>-1</sup> for 200 cycles or at different current densities of 50, 100, 200, 500, 1000, 2000 and again 50 mA g<sup>-1</sup> for every sequential 20 cycles, respectively.

## References

1 D. H. Teng, Y. H. Yu, P. W. Li, X. Bai and X. P. Yang, *RSC Adv.*, 2013, **3**, 14237.

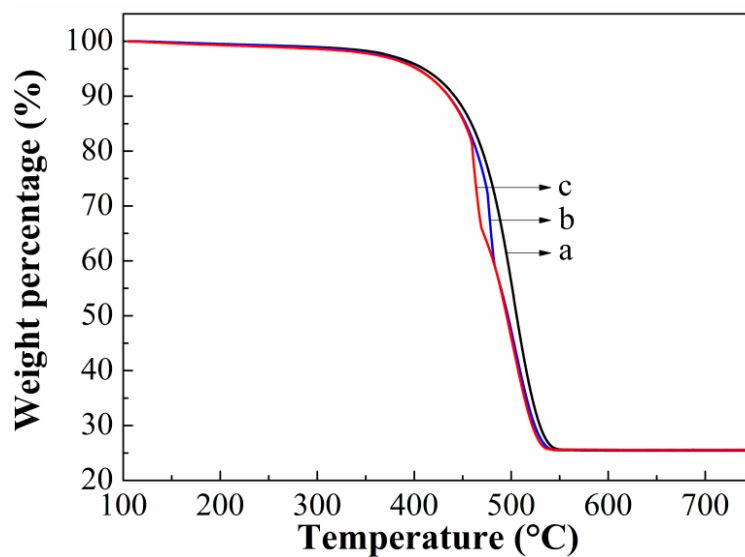

**Fig. S1** TGA curves of (a) nano-particulate, (b) micro-particulate and (c) flower-like  $\text{TiO}_2/\text{MPCNFs}$  at a heating rate of  $10\text{ }^\circ\text{C}/\text{min}$  in air.

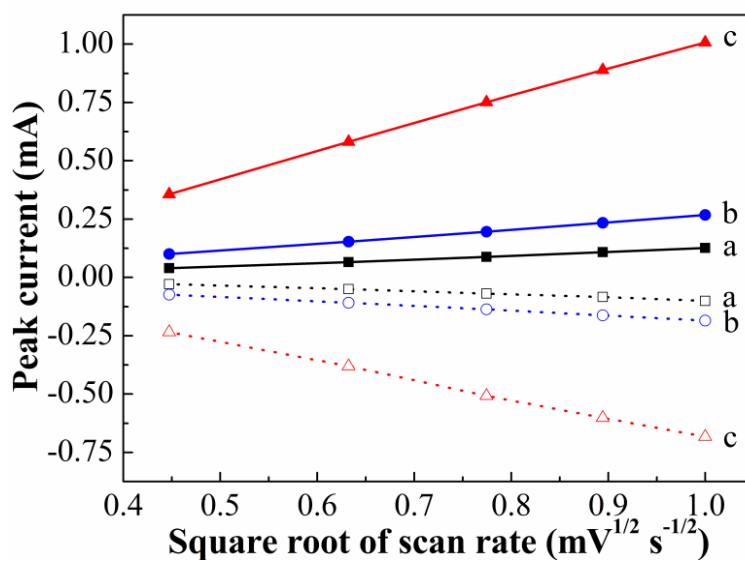

**Fig. S2** Plots of peak current vs. square root of scan rate of (a) nano-particulate, (b) micro-particulate and (c) flower-like  $\text{TiO}_2/\text{MPCNFs}$ .

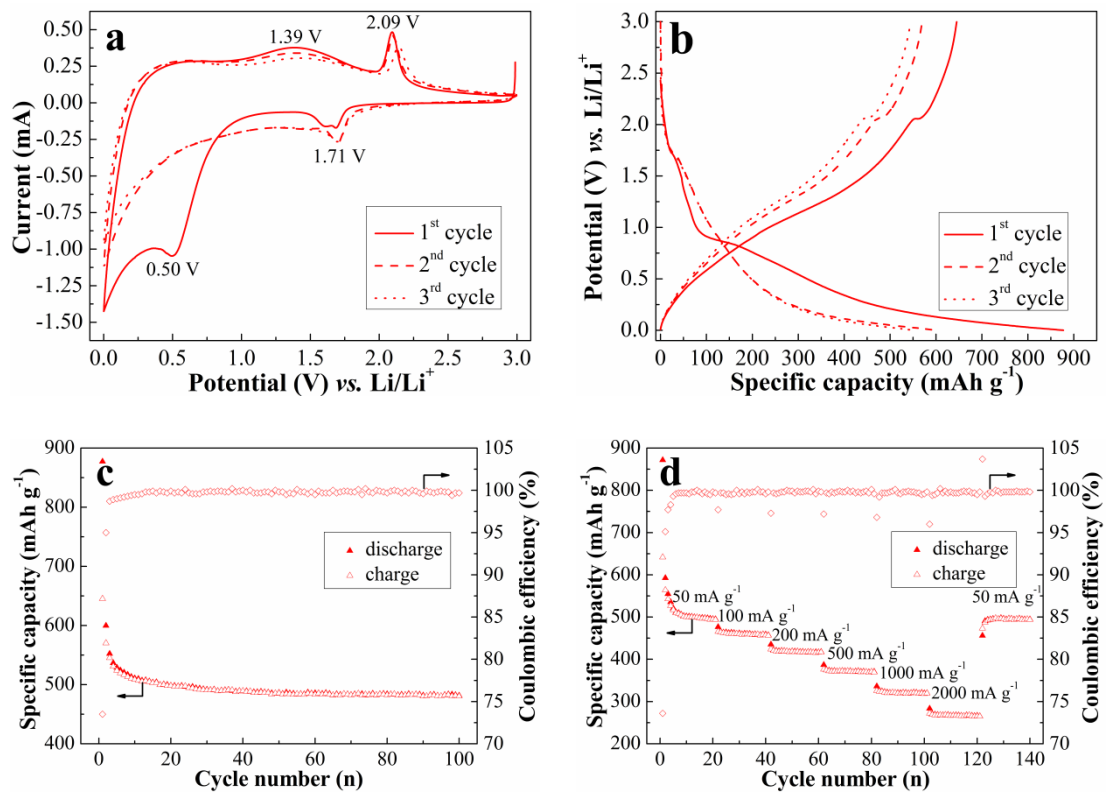

**Fig. S3** (a) CV curves for the initial three cycles of flower-like  $\text{TiO}_2/\text{MPCNFs}$  at a scan rate of  $0.2 \text{ mV s}^{-1}$  from 0.001 to 3 V. (b) Discharge/charge curves for the initial three cycles of flower-like  $\text{TiO}_2/\text{MPCNFs}$  anode at  $50 \text{ mA g}^{-1}$  from 0.001 to 3 V. (c) Cycling performance at  $50 \text{ mA g}^{-1}$  and (d) rate capability of flower-like  $\text{TiO}_2/\text{MPCNFs}$  from 0.001 to 3 V.
